# Supplementary material
Source: Research Square preprint supplement (doi:10.21203/rs.3.rs-9192876/v1)
Supplement: Supplementary file 1 [file 6dc36ff67a688cfc150b151a.docx]

**Evaluation of Air pollutant Concentration from Continuous and Instantaneous Sources**

**Khaled S. M. Essa1, Fawzia Mubarak2 and Safwat Salama3**

1 Egyptian Atomic Energy Authority (EAEA), Nuclear Research Center (NRC), Mathematical and Theoretical Physics Dept., Cairo, Egypt, *[Mohamedksm56@yahoo.com](mailto:Mohamedksm56@yahoo.com), Orcid: khaledessa (0000-0003-1477-5475)

2 Egyptian Atomic Energy Authority (EAEA), Nuclear and Radiological Safety Research Center (NRSRC),, Nuclear Fuel Cycle Safety Dept., , Cairo, Egypt, [fawziamubarak@yahoo.com](mailto:fawziamubarak@yahoo.com), Orcid: 0000-0003-2258-8362

3 Egyptian Atomic Energy Authority (EAEA), Nuclear Research Center (NRC), Radiation Protection Dept., Cairo, Egypt, topazgemss@gmail.com, Orcid: 0000-0002-1283-2627

**Abstract**

In this work. dispersion studies carried out in unstable conditions, and the observed concentrations were statistically evaluated with predicted concentrations using Gaussian plume model. The Gaussian plume model is used as semi-analytical solution of the molecular diffusion equation for respect to instantaneous and continuous point, line and area sources. Results show that the applied mathematical model is suitable and applicable as the predicted concentrations were in good agreement with the observed concentrations of I135 in all cases.

Fig. (2): Variation of observed and predicted concentrations of continuous point, line and area sources via downwind distance (m).
